# Supplementary material for: Candidate genes underlying the quantitative trait loci for root-knot nematode resistance in a Cucumis hystrix introgression line of cucumber based on population sequencing
Source: PubMed Central journal article supplement (PMC6831543; doi:10.1007/s10265-019-01147-1), 2019-10-25
Supplement: 10265_2019_1147_MOESM1_ESM.pdf [file 10265_2019_1147_MOESM1_ESM.pdf]

## **Electronic supplementary materials**

### **Title:**

Candidate genes underlying the quantitative trait loci for root-knot nematode resistance in a *Cucumis hystrix* introgression line of cucumber based on population sequencing

### **Authors:**

Chunyan Cheng, Xing Wang, Xuejiao Liu, Shuqiong Yang, Xiaqing Yu, Chuntao Qian, Ji Li, Qunfeng Lou, Jinfeng Chen

### **Journal:**

Journal of Plant Research

### **Corresponding author:**

Jinfeng Chen

(College of Horticulture, Nanjing Agricultural University, No.1 Weigang Street, Nanjing, 210095, China)

Tel: +00-86-2584396279

Fax: +00-86-2584396279

E-mail: [jfchen@njau.edu.cn](mailto:jfchen@njau.edu.cn)

**Content:**

**Figs. S1–S4**

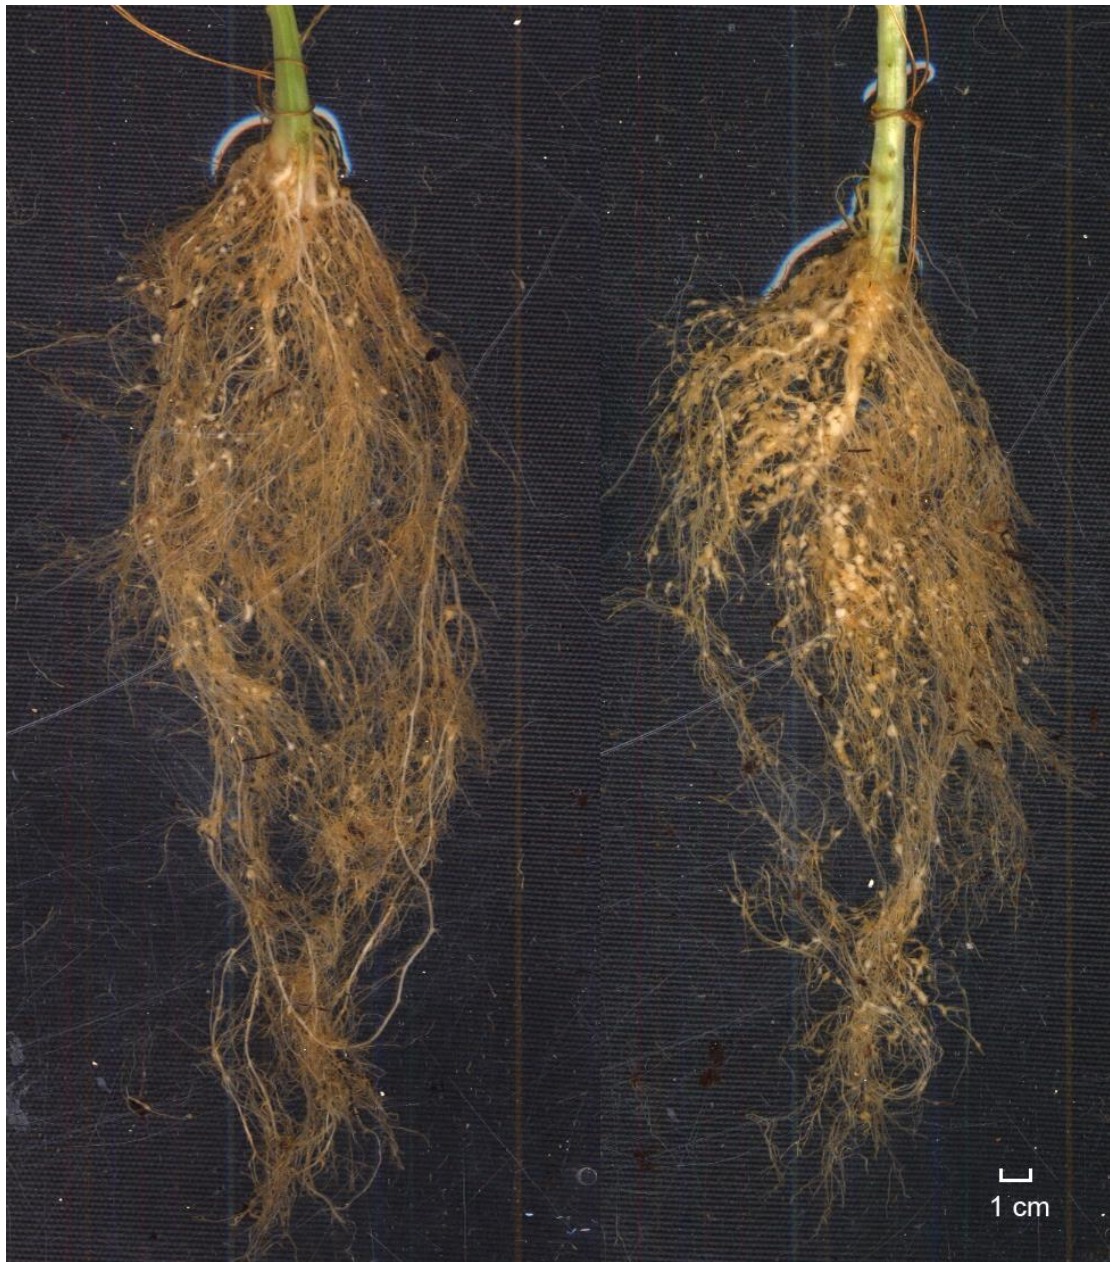

Figure S1 Root symptoms of Introgression line IL10-1 (left) and *C. sativus* var. CC3 (right) after 45 days inoculation with *Meloidogyne incognita*

Note: Bar=1.0 cm

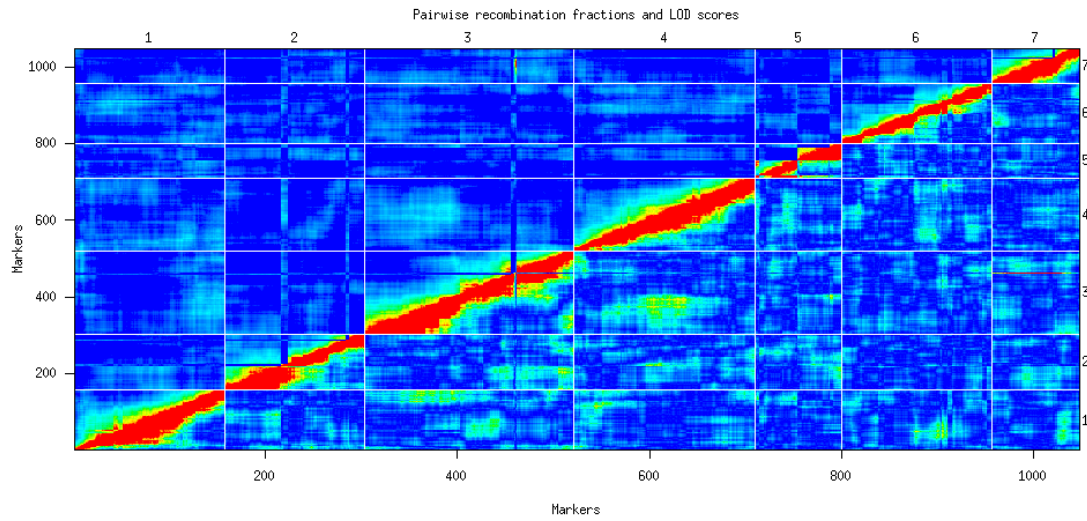

Figure S2 The heat-map of pairwise linkage markers analysis

Plot of estimated recombination fraction (upper-left triangle) and LOD scores (lower-right triangle) for all pairs of markers. Red indicates linked (large LOD score or small recombination fraction) and blue indicates not linked (small LOD score or large recombination fraction)



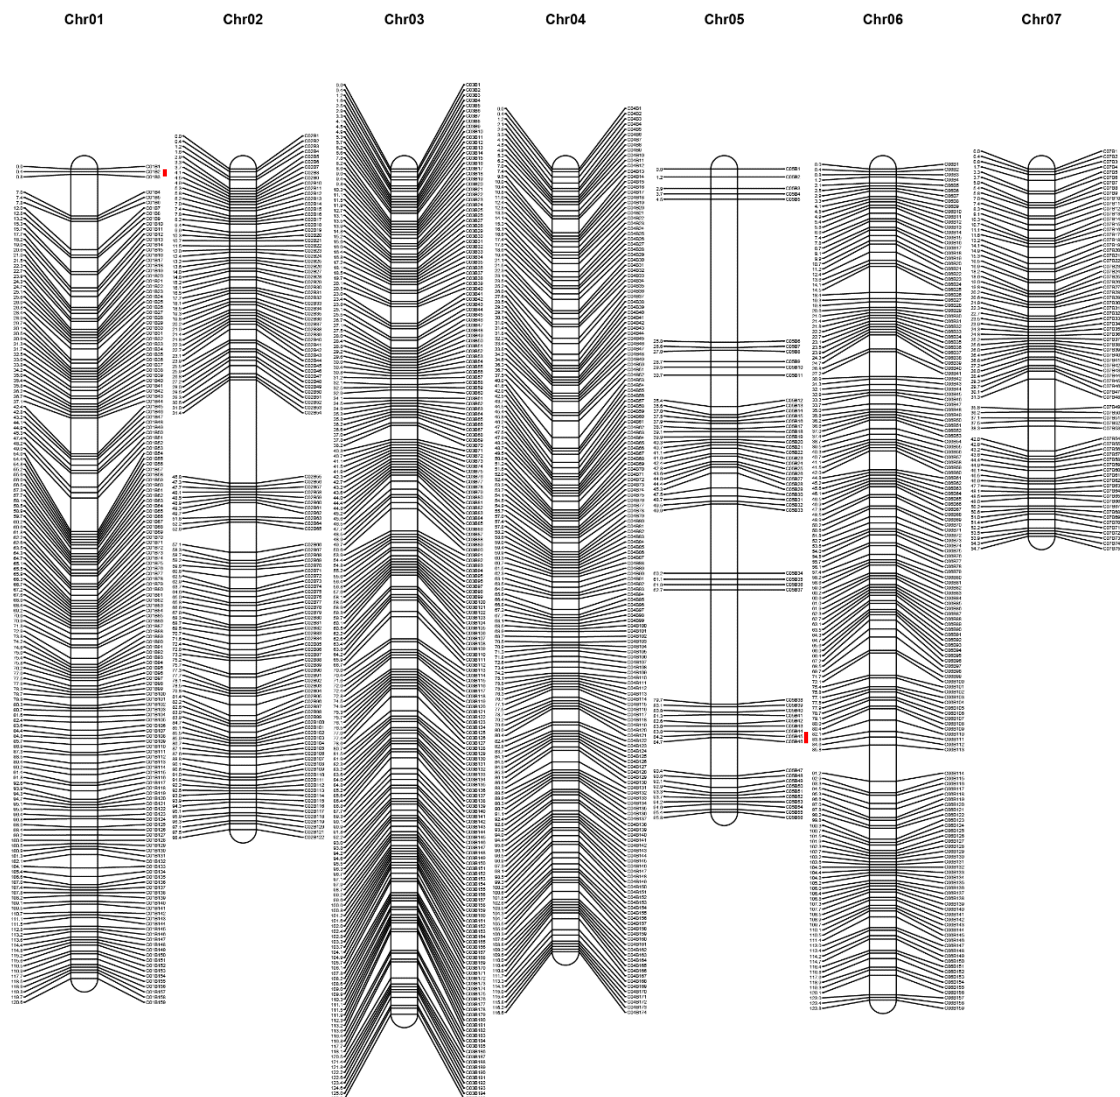

Figure S3 Genetic linkage Bin-map based on the RIL population derived from the cross IL10-1 × CC3

Note: Bin markers are named as CnBm, n represents for chromosome number, m represents for Bin number. The red vertical lines mark the locations of QTL.

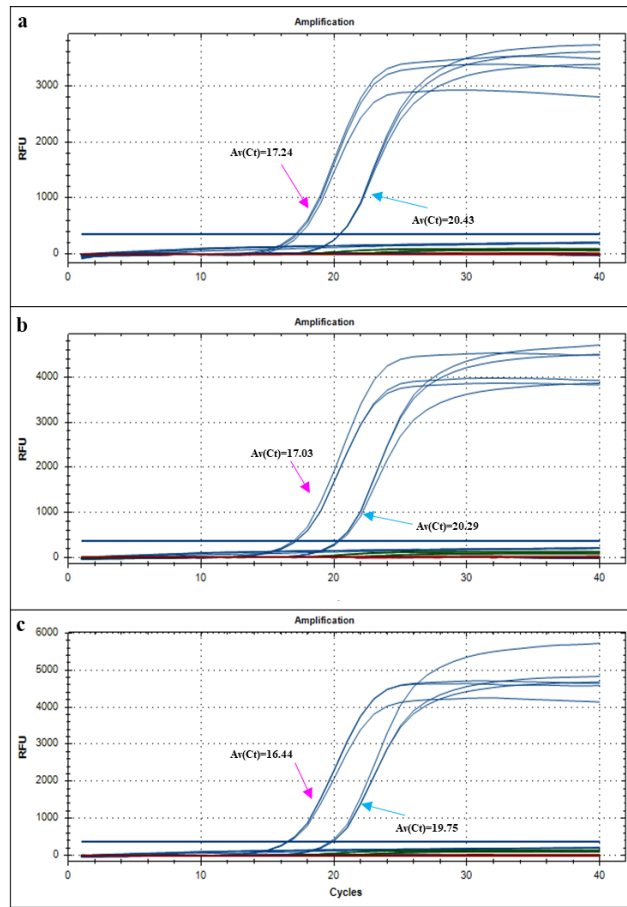

Figure S4 PCR efficiency was calculated for each target from the raw fluorescence data taken using a LightCycler 480 Real-Time PCR System.

**a, b, c** show the efficiency of different dilution rates (diluted 10:1) using cDNA of IL10-1 from 1, 2, 3 days post inoculation, which illustrating the efficiency is about 100%. Arrows in blue present cDNA diluted 10 times, and arrows in pink present cDNA without diluted.

Table S1 The Primers designed for RT-PCR analysis of The Four Candidate Genes to RKN

| Gene ID              | Primer sequences-Forward | Primer sequences-Reverse | Product Length<br>(bp) | Product GC<br>% |
|----------------------|--------------------------|--------------------------|------------------------|-----------------|
|                      | 5'-----'3                | 5'-----'3                |                        |                 |
| <i>EF1a</i>          | ACTGTGCTGTCCTCATTATTG    | AGGGTGAAAGCAAGAAGAGC     | 98                     | 46.4            |
| <i>Csa5M608240.1</i> | GGTGTGAATTTGAAAGCTAACG   | ACACAACCGAATTTAGTGGTTG   | 132                    | 26.5            |
| <i>Csa5M610420.1</i> | CGTCATGTGAATCTGAGGAGTA   | GCATTAAGGAAACAGGCAATGA   | 202                    | 38.1            |
| <i>Csa5M623410.1</i> | CACCATCCAACGCAACTGACACT  | TGGAGATGAACCCAAGTTAGGCG  | 122                    | 54.9            |
| <i>Csa5M610370.1</i> | TAACTTACAAATTCCGGCCA     | AATGAAGGGTAGGGAACAGA     | 159                    | 42.5            |

Table S2 Gall index of the F2:3 and F2:6 population, derived from IL10-1×CC3, of four different seasons in different experimental bases

| Indlabel    | F2:3-11Spring | F2:3-12Spring | F2:6-14Autumn | F2:6-15Spring | Indlabel    | F2:3-11Spring | F2:3-12Spring | F2:6-14Autumn | F2:6-15Spring |
|-------------|---------------|---------------|---------------|---------------|-------------|---------------|---------------|---------------|---------------|
| <b>1_2</b>  | 3             | 2.8           | 4             | 2.5           | <b>29_1</b> | 3.67          | 3.6           | 2.65          | 3.33          |
| <b>2_1</b>  | 3.33          | 2.67          | 4             | 2             | <b>30_1</b> | 2.5           | 2.33          | 4.65          | 3             |
| <b>3_2</b>  | 2.5           | 1.6           | 2.65          | 1             | <b>31_1</b> | 3             | 3.33          | 5             | 3.67          |
| <b>4_2</b>  | 3.33          | 2.5           | 4             | 1.67          | <b>32_2</b> | 2             | 2.6           | 4.35          | 3             |
| <b>5_2</b>  | 3             | 2.6           | 3.65          | 2             | <b>33_1</b> | 4.33          | 3.5           | 4.35          | 2.67          |
| <b>7_1</b>  | 2.5           | 2.83          | 4.5           | 3             | <b>34_1</b> | 3             | 3.5           | 3.65          | 4             |
| <b>8_3</b>  | 2.67          | 3.17          | 4             | 3.67          | <b>35_2</b> | 3             | 3.2           | 4.65          | 3.33          |
| <b>9_1</b>  | 3.33          | 3.17          | 2             | 3             | <b>36_3</b> | 3             | 3             | 4             | 3             |
| <b>10_3</b> | 4.5           | 3             | 2.65          | 1.5           | <b>37_1</b> | 4             | 3.67          | 4             | 3.33          |
| <b>11_2</b> | 3.33          | 3.4           | 3.35          | 3.5           | <b>38_2</b> | 3             | 3.2           | 4.5           | 3.5           |
| <b>12_3</b> | 3.67          | 3.5           | 3.35          | 3             | <b>39_2</b> | 3.67          | 3.8           | 2.65          | 4             |
| <b>13_1</b> | 3.67          | 3.5           | 4.65          | 3.33          | <b>40_2</b> | 2.67          | 2.8           | 1.65          | 3             |
| <b>14_2</b> | 3.67          | 3.6           | 2.65          | 3.5           | <b>42_3</b> | 3             | 2             | 3.5           | 1             |
| <b>15_1</b> | 3.67          | 3.33          | 4             | 3             | <b>43_2</b> | 2.5           | 2.2           | 4.35          | 3.33          |
| <b>17_1</b> | 3.33          | 3.67          | 3             | 4             | <b>44_2</b> | 3.33          | 4.6           | 3.35          | 4.33          |
| <b>18_1</b> | 2.5           | 2.4           | 2.5           | 2.33          | <b>45_1</b> | 3             | 3             | 3.5           | 3             |
| <b>19_1</b> | 3.67          | 3             | 3             | 2.33          | <b>46_1</b> | 3.67          | 3.17          | 4             | 2.67          |
| <b>20_1</b> | 4             | 4             | 5             | 4             | <b>47_1</b> | 3             | 2.5           | 4.65          | 2             |
| <b>21_1</b> | 4.5           | 4.2           | 2.35          | 4             | <b>48_2</b> | 3.67          | 3.83          | 3.35          | 4             |
| <b>22_1</b> | 3.67          | 3.33          | 1.65          | 3             | <b>49_1</b> | 3.67          | 3.33          | 2             | 3             |
| <b>23_1</b> | 3             | 3             | 3.35          | 3             | <b>50_3</b> | 3.67          | 3.33          | 3.65          | 3             |
| <b>24_1</b> | 3.67          | 2.83          | 2.35          | 2             | <b>51_1</b> | 4.33          | 3.17          | 5             | 2             |
| <b>25_1</b> | 3             | 3             | 1.65          | 3             | <b>52_3</b> | 2.5           | 2.33          | 3.65          | 2             |
| <b>26_1</b> | 3             | 3.17          | 2.5           | 3.33          | <b>54_1</b> | 3             | 2             | 3.35          | 1             |
| <b>27_1</b> | 3             | 3.33          | 4.5           | 3.67          | <b>55_1</b> | 3.5           | 3.4           | 3.35          | 3.33          |
| <b>28_2</b> | 2.67          | 2.5           | 3             | 2.33          | <b>56_2</b> | 3.33          | 2.17          | 2.15          | 1             |

continued to Table S2

| <b>Indlabel</b> | <b>F<sub>2:3-11Spring</sub></b> | <b>F<sub>2:3-12Spring</sub></b> | <b>F<sub>2:6-14Autumn</sub></b> | <b>F<sub>2:6-15Spring</sub></b> | <b>Indlabel</b> | <b>F<sub>2:3-11Spring</sub></b> | <b>F<sub>2:3-12Spring</sub></b> | <b>F<sub>2:6-14Autumn</sub></b> | <b>F<sub>2:6-15Spring</sub></b> |
|-----------------|---------------------------------|---------------------------------|---------------------------------|---------------------------------|-----------------|---------------------------------|---------------------------------|---------------------------------|---------------------------------|
| 57_1            | 3.33                            | 2.4                             | 2.65                            | 1                               | 80_2            | 3.00                            | 3.60                            | 2.35                            | 4.50                            |
| 58_2            | 2.33                            | 1.83                            | 4                               | 1.33                            | 81_3            | 3.33                            | 2.57                            | 4.35                            | 2.00                            |
| 59_1            | 3.33                            | 2.8                             | 3                               | 2                               | 82_2            | 2.67                            | 2.83                            | 1.65                            | 4.00                            |
| 60_3            | 2.33                            | 2.4                             | 2.5                             | 2.5                             | 83_3            | 3.50                            | 3.20                            | 3.25                            | 3.00                            |
| 61_2            | 3.33                            | 2.33                            | 3                               | 1.33                            | 84_1            | 4.00                            | 3.00                            | 3.65                            | 2.00                            |
| 62_1            | 4                               | 2.6                             | 3.65                            | 1.67                            | 85_1            | 3.67                            | 3.33                            | 1.65                            | 3                               |
| 63_2            | 3                               | 2.67                            | 2                               | 2.33                            | 86_3            | 4                               | 3.67                            | 3.65                            | 3.33                            |
| 64_3            | 4.33                            | 3.33                            | 5                               | 2.33                            | 87_1            | 3.67                            | 3.67                            | 2.65                            | 3.67                            |
| 65_2            | 3.33                            | 2.83                            | 3.5                             | 2.33                            | 89_2            | 3.67                            | 3.33                            | 1.65                            | 3                               |
| 66_1            | 2.5                             | 2.6                             | 3.65                            | 2.67                            | 90_1            | 3                               | 2.4                             | 2.65                            | 2                               |
| 67_3            | 3.33                            | 3.4                             | 3.65                            | 3.5                             | 91_1            | 3.5                             | 3                               | 2                               | 2.67                            |
| 68_1            | 3                               | 2.75                            | 3.35                            | 2                               | 92_3            | 4                               | 3.6                             | 2.35                            | 3.33                            |
| 69_1            | 4.33                            | 3.33                            | 0                               | 3.5                             | 93_2            | 3                               | 3.2                             | 1.35                            | 3.33                            |
| 70_1            | 3.33                            | 3.5                             | 2.35                            | 3.67                            | 94_2            | 2.33                            | 2.67                            | 2.65                            | 3                               |
| 71_2            | 3.67                            | 3.6                             | 4.65                            | 3.5                             | 95_1            | 5                               | 2.5                             | 4.35                            | 1.67                            |
| 72_1            | 3.5                             | 3                               | 4.35                            | 2.67                            | 96_1            | 2.67                            | 2.17                            | 2.35                            | 1.67                            |
| 73_1            | 4                               | 3.33                            | 4.65                            | 2.67                            | 97_1            | 2.33                            | 2.5                             | 3.65                            | 2.67                            |
| 74_1            | 4.5                             | 4                               | 4.35                            | 3.67                            | 98_2            | 2.67                            | 2.83                            | 3                               | 3                               |
| 75_1            | 3                               | 3.2                             | 2.65                            | 3.5                             | 99_3            | 3                               | 3.33                            | 3                               | 3.67                            |
| 76_2            | 2.33                            | 2.17                            | 2                               | 2                               | 100_1           | 3                               | 2.2                             | 2.65                            | 1.67                            |
| 77_1            | 3                               | 2.83                            | 1.65                            | 2.67                            | 101_1           | 2.5                             | 3                               | 3                               | 3.33                            |
| 78_1            | 3                               | 2.5                             | 1                               | 2                               | 102_2           | 3.33                            | 2.5                             | 4                               | 1.67                            |
| 79_2            | 5                               | 4.8                             | 1.35                            | 4.67                            | 103_3           | 3                               | 2.75                            | 1                               | 2.5                             |



continued to Table S2

| <b>Indlabel</b> | <b>F<sub>2:3</sub>-11Spring</b> | <b>F<sub>2:3</sub>-12Spring</b> | <b>F<sub>2:6</sub>-14Autumn</b> | <b>F<sub>2:6</sub>-15Spring</b> | <b>Indlabel</b> | <b>F<sub>2:3</sub>-11Spring</b> | <b>F<sub>2:3</sub>-12Spring</b> | <b>F<sub>2:6</sub>-14Autumn</b> | <b>F<sub>2:6</sub>-15Spring</b> |
|-----------------|---------------------------------|---------------------------------|---------------------------------|---------------------------------|-----------------|---------------------------------|---------------------------------|---------------------------------|---------------------------------|
| 104_2           | 3                               | 2.17                            | 1.35                            | 1.33                            | 117_1           | 3.33                            | 2.83                            | 3                               | 2.33                            |
| 105_1           | 3.5                             | 2.2                             | 2                               | 1.33                            | 118_1           | 3.5                             | 4                               | 4                               | 4.33                            |
| 106_3           | 3.5                             | 3.25                            | 2.65                            | 3                               | 119_2           | 3.33                            | 3.83                            | 3.65                            | 4.33                            |
| 107_2           | 3                               | 2.5                             | 2                               | 2                               | 120_1           | 3.67                            | 3.17                            | 1                               | 2.67                            |
| 108_3           | 3.67                            | 3.17                            | 3                               | 2.67                            | 121_3           | 3.5                             | 3.6                             | 3.35                            | 3.67                            |
| 110_1           | 3.67                            | 2.67                            | 3.35                            | 1.67                            | 122_3           | 3                               | 2.33                            | 2.65                            | 2.67                            |
| 111_1           | 3.67                            | 2.33                            | 4                               | 1                               | 123_2           | 3.5                             | 2.8                             | 3                               | 3.67                            |
| 112_1           | 3.67                            | 2.5                             | 3                               | 1.33                            | 124_2           | 3                               | 2.6                             | 4.65                            | 2.33                            |
| 113_3           | 3.5                             | 3                               | 3                               | 3.67                            | 125_1           | 4                               | 3.6                             | 4.35                            | 3.33                            |
| 114_2           | 3                               | 2.5                             | 3.35                            | 2                               | 126_3           | 4                               | 3                               | 1.65                            | 3.33                            |
| 115_3           | 4                               | 3.4                             | 2.65                            | 3                               | 127_2           | 3.33                            | 3.67                            | 3.65                            | 4                               |
| 116_2           | 3                               | 3                               | 3.35                            | 0                               | 128_3           | 4                               | 3.4                             | 3.35                            | 2.5                             |

Table S3 The sequence information of The Four Candidate Genes to RKN

| Gene ID              | DNA sequence                                                                                                                                                                                                                                                                                                                                                                                                                                                                                                                                                                                                                                                                                                                                                                                                                                                                                                                                                                                                                                                                                                                                                                                                                                                                                                                                                                                                                                                                                                                                                                                                                                                                                                                                                                                                                                                                                                                                                                                                                                                                                                                                                                                                                                                                                        | protein sequence                                                                                                                                                                                                                                                                                                                                                                                                                                                                                                                                                                                                                                                                                                                                                                                                                | position of mutations | mutation type |
|----------------------|-----------------------------------------------------------------------------------------------------------------------------------------------------------------------------------------------------------------------------------------------------------------------------------------------------------------------------------------------------------------------------------------------------------------------------------------------------------------------------------------------------------------------------------------------------------------------------------------------------------------------------------------------------------------------------------------------------------------------------------------------------------------------------------------------------------------------------------------------------------------------------------------------------------------------------------------------------------------------------------------------------------------------------------------------------------------------------------------------------------------------------------------------------------------------------------------------------------------------------------------------------------------------------------------------------------------------------------------------------------------------------------------------------------------------------------------------------------------------------------------------------------------------------------------------------------------------------------------------------------------------------------------------------------------------------------------------------------------------------------------------------------------------------------------------------------------------------------------------------------------------------------------------------------------------------------------------------------------------------------------------------------------------------------------------------------------------------------------------------------------------------------------------------------------------------------------------------------------------------------------------------------------------------------------------------|---------------------------------------------------------------------------------------------------------------------------------------------------------------------------------------------------------------------------------------------------------------------------------------------------------------------------------------------------------------------------------------------------------------------------------------------------------------------------------------------------------------------------------------------------------------------------------------------------------------------------------------------------------------------------------------------------------------------------------------------------------------------------------------------------------------------------------|-----------------------|---------------|
| <i>Csa5M608240.1</i> | ATGAGGAAGCTGTTTATTGTTATGTTCTTTGTCTGTTTGGGAAGTTGGAGAAGCTATGCACAAGACAGTGGAGAAGCTCCAATGGAGAA<br>AACAGAGATGGATTCTCTGTTCTCTTCTATTCAAGGCTTTGGGTAATTGGTGGAAATGGCTCAGATTATACCCAGATCCCTGTGGATGG<br>ACGCCAATACAGGGGGTTTCTGTGATATATTGATGGGCTTTGGTATGTCACCTACTAAACATTTGGACCAACTCATGACAATTCTCTAG<br>CTTGTTCCTCCAAATGCTCAITTCAGACAGCAATTTGTTCAACTCAAACACCTTAAAACTCTGTCCTTCTTAACTGTTTCGTCTCAACAA<br>AAGGGAAGAATTCTGTTCACTCCAACTGGAGAATGGCTTAACTTCGCCGGAACTTTAGAATCTCTTGAGTTCAGATCAAACTCCGCA<br>CTTTCCGGACAATTCCTGCCAGTTTAGGGACTTTGTCAAAGCTGCAATCTTTGGTCTGTTACAGAACGGATTTCGTCCGGTAAATACCA<br>GAAAATTTTGGCGATTGATCGAATTGAAACGATTGGTCTTCTGCTGGGAACCTCACTACTGGCCCAATCACTAAAATCTAGGCAAGTT<br>AAGCGAACTACTGATTTGGATTGAGTAGAAATCGTTGTCGGGTTCTTTACCATTAAAGTTTGGGAAATTTGACGGCCCTTTGAAGCT<br>TGATCTAAGTGAAGACAAATTGAGTGGAAATTTGCCTAGTGAATTAGGCAATATGGGAAATTTGACGCTTTTGGACTTAAGCAACAATAG<br>CTTCTACGGTGGATTGAGACAGTCGTTTGAAGAAGATGAGTTCCTTAGAAGAAATATCTATCCAGCAACCAATTTGGGGGAGAATCA<br>ATACCATAAACTGGAAAAATCTACAAAA[T->A]TTAGCGATTTTGGATCTTCTTACATGGGCTGTATGGGGAATTCAGATTCAATTATC<br>TGAATTGAAAAGTCTACGGTTTTTGGGACTTAGCCACAACAATTAACAGGAACCCCTCTCCAAAACCTTGCAAACTGCCATTTGTTA<br>GTGCAATTACTTGTGGAAACAATTTGTCTGGTGACCTTAAATCTCCCAACAGTTTACGGGAAAATGGGAAGGAGATTTGGGGCAT<br>GGGACAATCTAATCTGTGTTACCCCATTTGGAACGTTGGCGGCAAAAAATGCTCCATTTGGTGTGAAGCATGTGAGGAAGAAAAAGA<br>AGAAGAAGTGGTGAATTTGATGAAGAAACCCATCTCCAAGCGAGTTTTGATACAAACAATTTGAAATTTGATGTTTCAAAGGGCTATT<br>CTCTAATTGAAATGAAGAAATTTGGTTGAAATTTGGGGGAACACATTAACGATGGTCTGTTAATCAATATGCTTTTATGA                                                                                                                                                                                                                                                                                                                                                                                                                                                                                                                                                                                                                                                                                                                                                                              | MRKLFVIMFFVCLGSWRSYAQDSGEAPM<br>EKTEMDSLFSSIQGFVGNWVNGSDLYPD<br>PCGWTPIQGVSCDIFDGLWVYVTSLNIGPT<br>HDNSLACSPNAHFRQQLFQLKHLKTLSTFF<br>NCFVSTKKGKNSVSLPTGEWLKLAGTLES<br>EFRSNSALSGQIPASLGLSKLQSLVLLQN<br>GFVGEIPESFGDLIELKRLVLVAGNSLTGPIT<br>QNLGKSELLILDLSRNSLSGSLPLSLGNL<br>TALLKLDLSENKLSGILPSELGNMGNLTL<br>DLNSNSFYGGRLQSFEMSSLEEILSSNPI<br>GGELNTINWKNLQ[N->K]LAILDLSYML<br>YGEIPDLSSELKSLRFLGLSHNNLTGTPSP<br>KLANLPFVSAIYLFGNLSDGLKFSQFY<br>GKMGRRFAGAWDNPNLCYPIGLAAKNAP<br>FGVKPCEEEKEEVVKLMKKPISKASFDT<br>NNWNFDVSKGYSLIGNEEFWLKFGVNTL<br>TMVLLINMLL*                                                                                                                                                                                                                                                                      | 23326853              | T->A          |
| <i>Csa5M610420.1</i> | ATGGCAAAAATTCCTTCAGTATCCTTTTTTTTCTCCTCTGCAACTTATATGCTTTCTATGGCTTCTTTGAACAATGAAGGCAATGCCCT<br>TTTATCAITCAAGCAATCCATTACTGAAGACCCGAGGGATGCTTAGCAACTGGAATCTTCAGATGAAACCCCATGTAGTTGGAATGG<br>AGTTACATGCAAGATCTAAGAGTTGTTTCTCTTAGTATCTTAGGAAGAACTTAATGGGGTCTTTCTCTCTCTAGGGTTTCTGTCT<br>GAGCTTCGTCTATGTAATCTGAGGAGTAATAAACTCCATGGAACCTTTGCCAGTGGAGCTTTTCAAGCTAATGGAATTCAAAGTTTGGTG<br>CTTTATGGAAATTCCTTCACTGGGTCTGTTCCAAATGAGATTGGTAAGCTTAAAAACCTTCAAATCTTTGATTTGTCACAGAATTCCTTA<br>ATGGGTCATTGCCCTGTTTCCCTTAATGCAATGTACAAGGTTGAGAATCTTGATCTTAGTCAGAAATAATTTACTAATCTCTGCCTAGTGG<br>TTTGGTTCCAGTTTGAATTTCTTGGAAACGTTGGATCTTTCTATAATAAGTTTAAATGGTCAATTCCAATGGATATGGTAATTTGTCTAG<br>CTTACAAGGCACTGTTGATTTCTCACATAATTTGTTTTCTGGCTCTATCCACCCAGCCTGGGCAACCTTCCGAAAAAGGTTTATATTGAT<br>CTTACTTATAATAATTTGAGTGGTCAATACCCAAAATGGTGTCTTATGAACAGAGGACCAACTGCTTTTATTGGGAATCTTGGCCTTT<br>GTGGACCGCCTTGAAGAACCATGTTCTTCCGAACTCCGGGTGCGAGTTTCTCCGTCTCATTCCTTTTTTCCCGGACAATATCCCGC<br>CTGGGAGTTCTGAGGGTAATGGTCAATAAGTTTGAACAAGGTTGGTTGAGTAGGAGCACTTAGTTGCAATAATCATAGGCGACATTGTA<br>GGTATTGGCTCATCGGTTTGTCTTTTCTGATTGCTATTGAGGTTTGCACCTATAGAATGGGAAGAAGGCAGACCAATCTAGTTATG<br>GATTTGAGAAGGGTGAGAAAGGAAGAAAGGATTGCTCTGCTTTCAAAGAGAGTGAATCTGAGAACGTTTCAGAGCATATCGAGCAAGTT<br>TGATTTGGTACCCTGGATTCAACAAGTGACATTTGATCTTGACGAACTTCTCAAAGGCATCAGCAATTTGTTTTGGGAAAAAGTGGTATCGG<br>GATCGTGTATAAAGTCGTGCTTGAAGATGGACTCACTTTAGCTGTGAGAAGATTGGGTGAAGGTGGTTCTCAAAGATTAAGAAATTTT<br>AACTGAAGTTGAAGCAATTTGGAGGTTGAGGATCCAAATGTTGTTAGCCTTAGAGCATATTTGGTCTGTTGATAGAAAACCTGCTTA<br>TTTACGATACATCCCAATGGGAACCTTGCATCTGCCGTTGATGGGAAGCCGGAACAACGTCGTTTACACCTTACCATGGTCTGTTCT<br>GGTTTGAATCATGA[T->C]AGGCATTGCAAAAAGGTTGGTTTACTTGCACGAGTATAGCCCCAAAAAGTACGTTTATGGTAATTTGAAA<br>ACAAACAACATACTTCTGGACACGACATGACACCAAAAATTTCTAATTTCCGGGTAGCCCGCTTGTAAACATTGCTGGAGGATCACC<br>AACCGTCAATCGAGCCATATAGCAGAGGAAAAATCACAAAGAAACAACCTGAAGTCTGCCACCTCTGAAGCTAGTACATTCAGTTCT<br>AGTATGAGTACTTACTACCAAGCCCTGAAGCGTTGAAAAGTCTGGAAGCCATCACAGAAATGGGACGTTTACTCATATGGTGTGATATTA<br>CTCGAAATGATACCCGGAAGATTGCCATAGTTCAAGTGGGAACGTCAGAAATGGATCTTGTTCATAGGATCAACTCTGCATGAAAGA<br>AAAGAAAGCCGCTTTCAGACGTAATAGACCCGTCATTGGCTCCAGACGACGATGCTGACGAGGATCATAGCGGTTTTGAAGATAGCAT<br>TAGCTTGTGTTCAAAAATCCAGAAAGAAGACCTGCAATGAGGCATGTTTGTGATGCTTTGGGCAAGTTGGCTGTCACTCCAACTAA | MAKIPSVSFFLLCNLLCLSMASLNNEGN<br>ALLSFKQSIDEDPEGCLSNWNSDETPCS<br>WNGVTKCDLDRVVSLSPRKKLNGVLSL<br>GFLSELRHVNLRSNKLHGTLPVELFQANG<br>IQSLVLYGNSFTGVSVPNEIGLKNLQIFDL<br>SQNFLNGSLPVSLMQCRLRILDLSQNNF<br>TNSLPSGFGSSLNLETLDLSYNKFN<br>MDIGNLSSLQGTVDVDFSHNLFSGSIPPSLGN<br>LPEKVYIDLTYNNLSGIPQNGALMNRGP<br>TAFIGNPGLCGPPLKNPCSETPGASSPSS<br>PFFPDNYPPGSSENGHFKFDKGLSRSTL<br>VAHIGDIVGICLIGLLFSYCYSRFCTHRNG<br>KKADQSSYGFEKGEKGRKDCLCFQKSES<br>ENVSEHIEQFDLVPDLSQVTFDLDELLKA<br>SAFVLGKSGIGIVYKVVLEDGLTAVRRL<br>GEGGSQRLKEFQTEVEAIGRLRHPNVSL<br>RAYYWSVDEKLLIYDIPNGNLASAVHG<br>KPGTTSFTPLPWSVRFGM[I->T]GIAGKGLV<br>YLHEYSPPKYVHGNLKTNNILLGHDMP<br>KISNFGLARLVNIAGGSPTVQSSHIAEKS<br>QEKQLKATSEASTFSSMSTYYQAPEAL<br>KVVKPSQKWDVYSYGVILLEMITGRLPIV<br>QVGTSEMDLVQWQLCIEKKPLSDVIDP<br>SLAPDDDADEIILAVLKIALACVQNNPERR<br>PAMRHVCDALGKLAIVTPN* | 23758300              | T->C          |
